# Supplementary material for: Network analysis of the metabolome and transcriptome reveals novel regulation of potato pigmentation
Source: PubMed Central journal article supplement (PMC4762390; doi:10.1093/jxb/erv549), 2016-01-04
Supplement: supp_erv549_supplementary_figures_S1_S6_tables_S1_S3.pdf [file supp_erv549_supplementary_figures_S1_S6_tables_S1_S3.pdf]

## Supplementary Fig. S1 (Cho et al 2015)

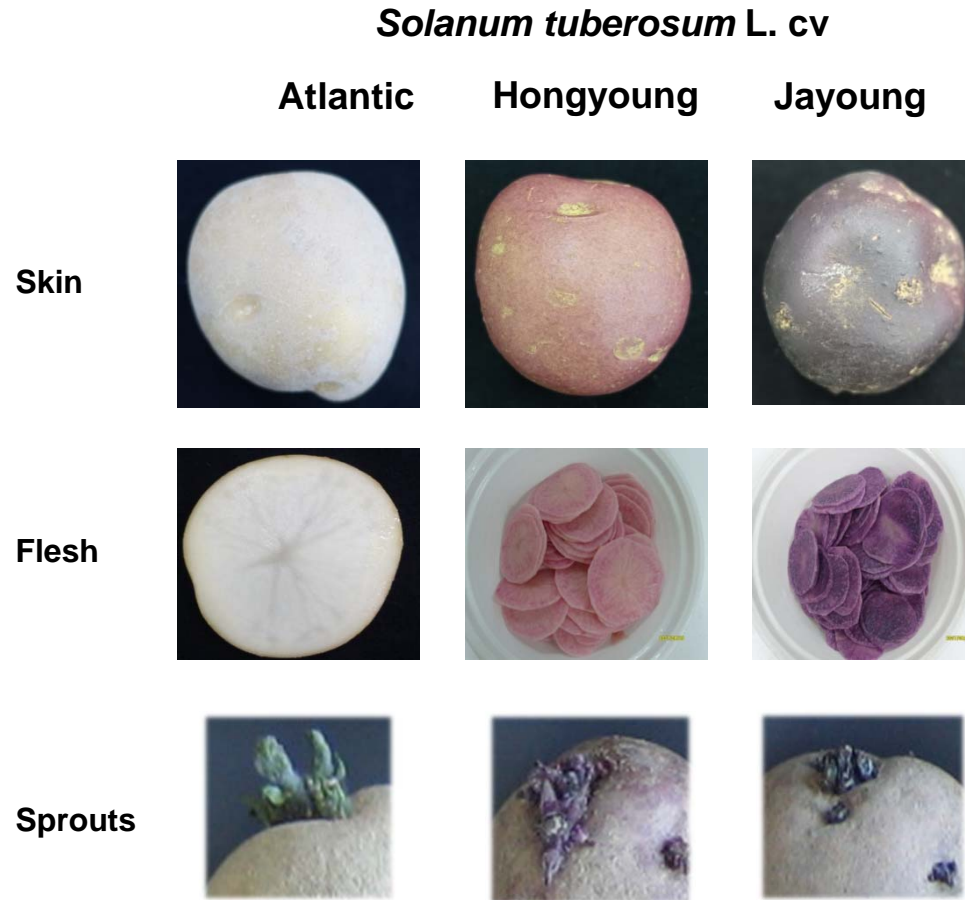

Fig. S1. Tubers and sprouts of *Solanum tuberosum* cv Atlantic, Hongyoung and Jayoung. Atlantic has white skin and white flesh, Hongyoung has light red skin, light-red flesh and light red sprouts, and Jayoung has dark purple skin, dark purple flesh and dark purple sprouts.

## Supplementary Fig. S2 (Cho et al 2015)

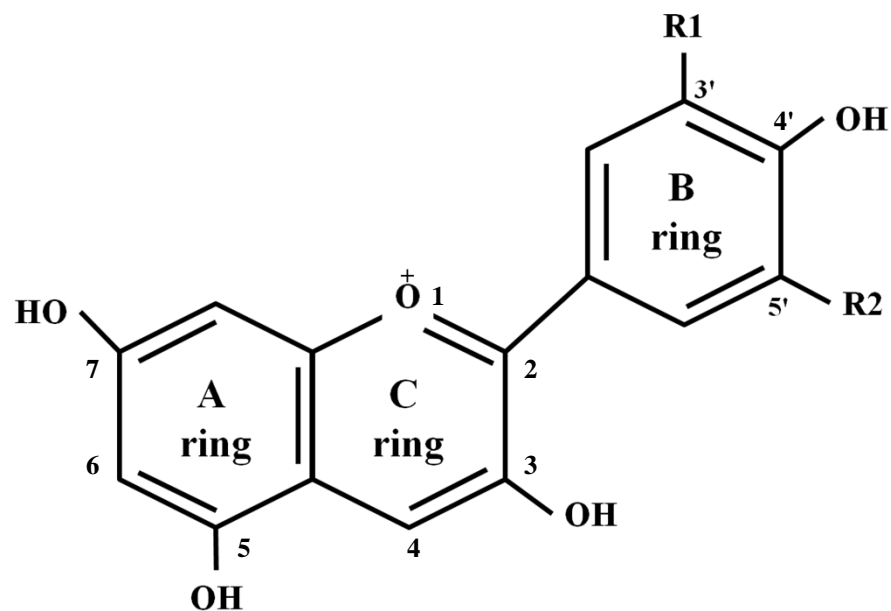

| Anthocyanidin     | R1               | R2               | Aglycone Formula    |
|-------------------|------------------|------------------|---------------------|
| Cyanidin (Cy)     | H                | OH               | $C_{15}H_{11}O_6^+$ |
| Delphinidin (Dp)  | OH               | OH               | $C_{15}H_{11}O_7^+$ |
| Pelargonidin (Pg) | H                | H                | $C_{15}H_{11}O_5^+$ |
| Peonidin (Pn)     | OCH <sub>3</sub> | H                | $C_{16}H_{13}O_6^+$ |
| Petunidin (Pt)    | OCH <sub>3</sub> | OH               | $C_{16}H_{13}O_7^+$ |
| Malvidin (Mv)     | OCH <sub>3</sub> | OCH <sub>3</sub> | $C_{17}H_{15}O_7^+$ |

**Fig. S2.** Structure and molecular formula of anthocyanidins.

(Ref : Wu and Prior (2015) J. Agri.Food Chem 53,3101-3113)

# Supplementary Fig. S3 (Cho et al 2015)

## A) OPLS-DA in ESI+ mode

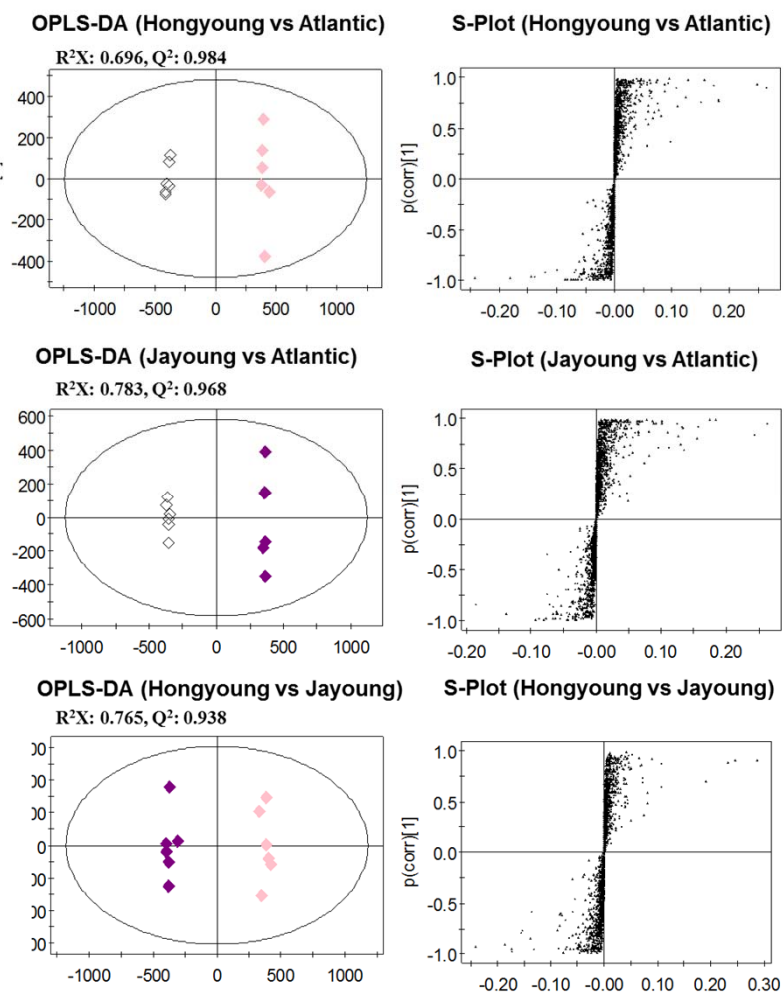

## B) OPLS-DA in ESI- mode

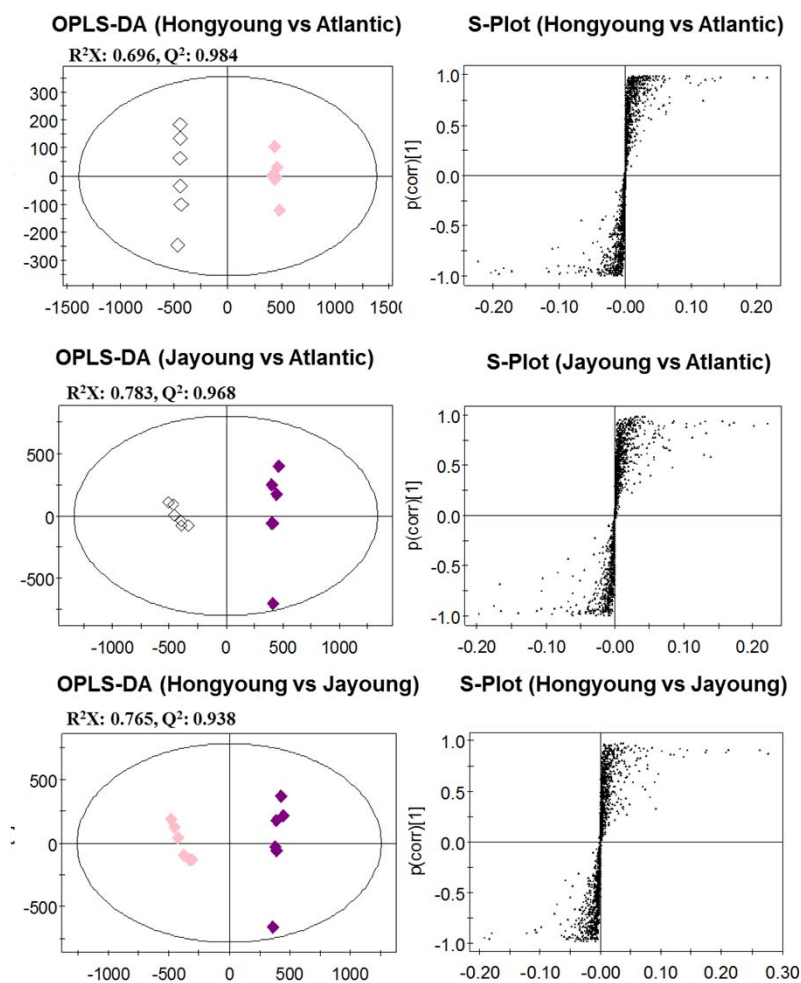

**Fig. S3.** Score plots and S plots of orthogonal partial least-squares discriminant analysis (OPLS-DA) in positive (A) and negative (B) modes. To evaluate metabolite mass ions that cause discrimination between Hongyoung and Atlantic, between Jayoung and Atlantic, and between Jayoung and Hongyoung, the  $p(\text{corr})$  value of each mass ion were acquired from S plots of OPLS-DA. Open diamond : Atlantic, pink diamond : Hongyoung, purple diamond : Jayoung

# Supplementary Fig. S4 (Cho et al 2015)

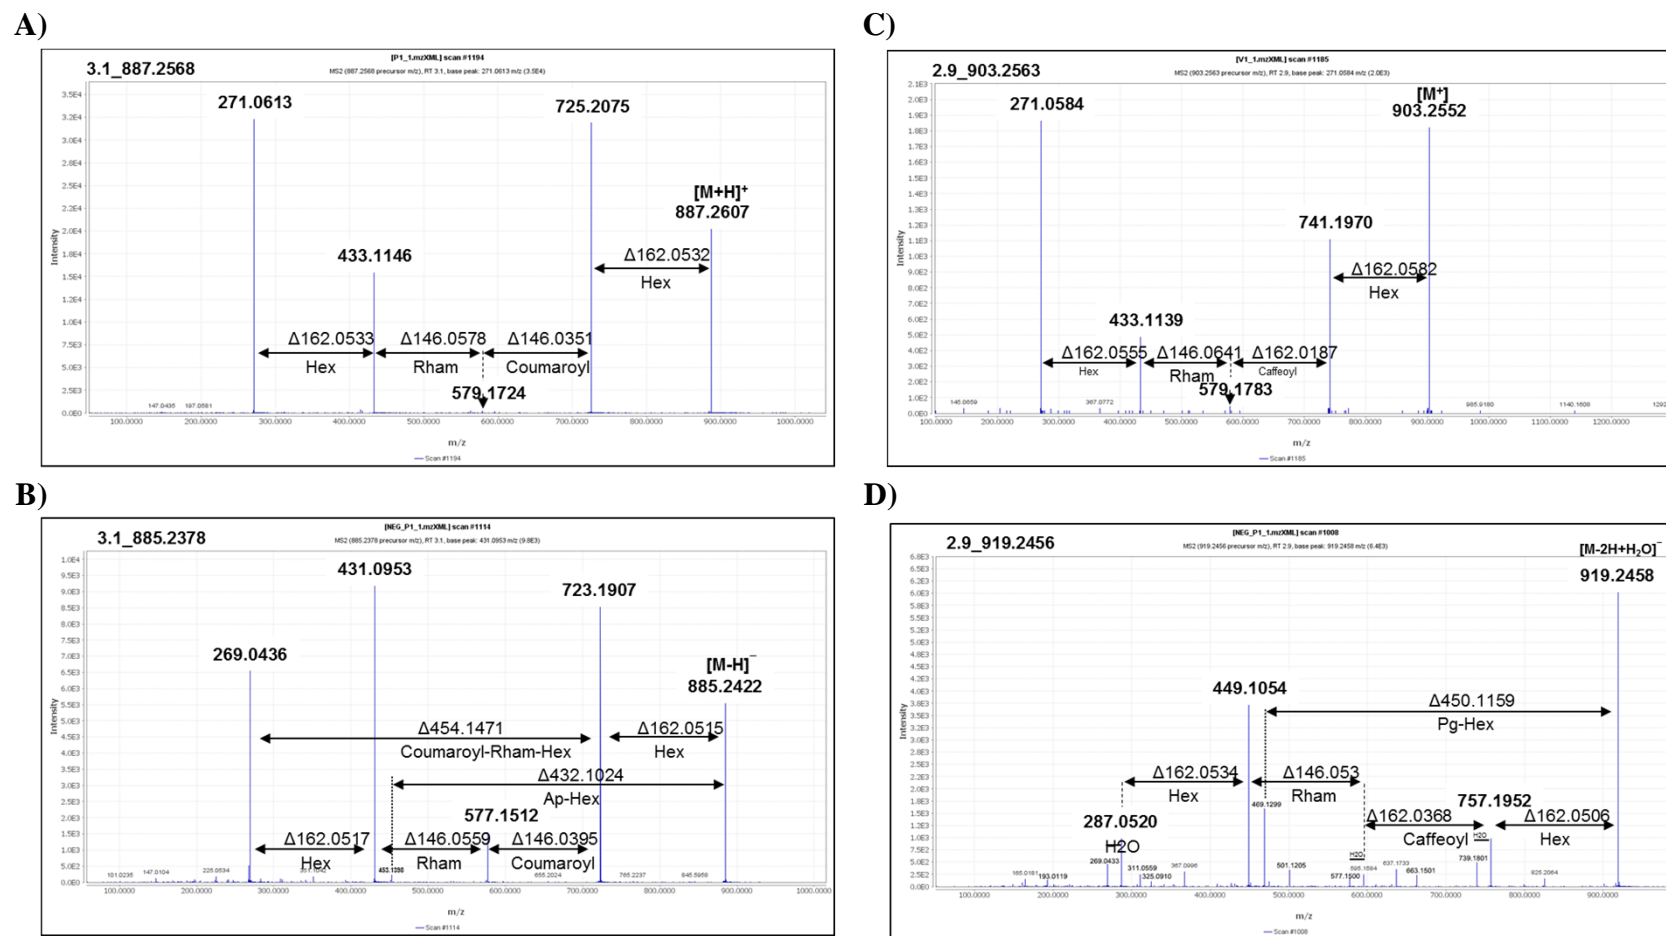

**Fig. S4.** Analysis of MS<sup>2</sup> fragmentation of flavonoids. MS<sup>2</sup> spectra of apigenin-coumaroyl-Rham-2 Hex in positive (A: 3.1<sub>RT</sub>\_887.2568) and in negative (B: 3.1<sub>RT</sub>\_885.2378) modes. MS<sup>2</sup> spectra of pelargonidin-caffeoyl-Rham-2 Hex in positive (C: 2.9<sub>RT</sub>\_903.2563) and in negative (D: 2.9<sub>RT</sub>\_919.2456) modes. Δ value represents neutral loss between two mass peaks and their identification is performed based on their exact mass values described in Supplementary Table 1. Compound abbreviated as follows: Hex, hexose; Rham, rhamnose; Caffeoyl, caffeic acid; Coumaroyl, coumaric acid; Ap, apigenin; Pg, pelargonidin.

**Supplementary Fig. S5 (Cho et al 2015)**

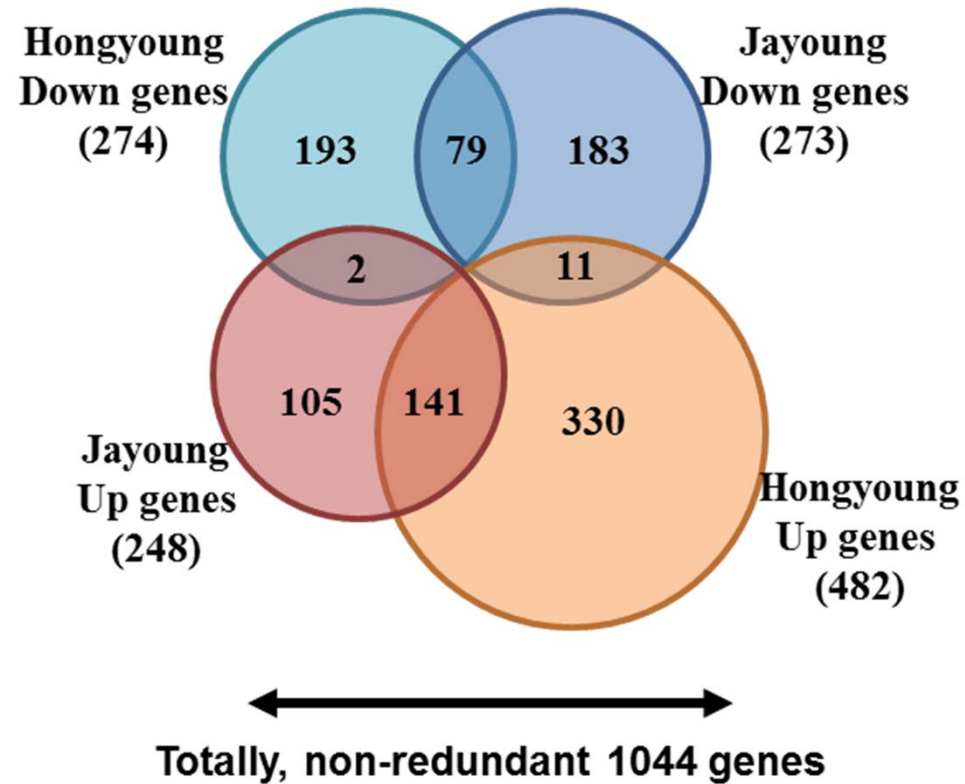

**Fig. S5.** The number of differently expressed genes comparing expression level of each gene between Hongyong and Atlantic, between Jayoung and Atlantic and between Hongyong and Jayoung.

## Supplementary Fig. S6 (Cho et al 2015)

A)

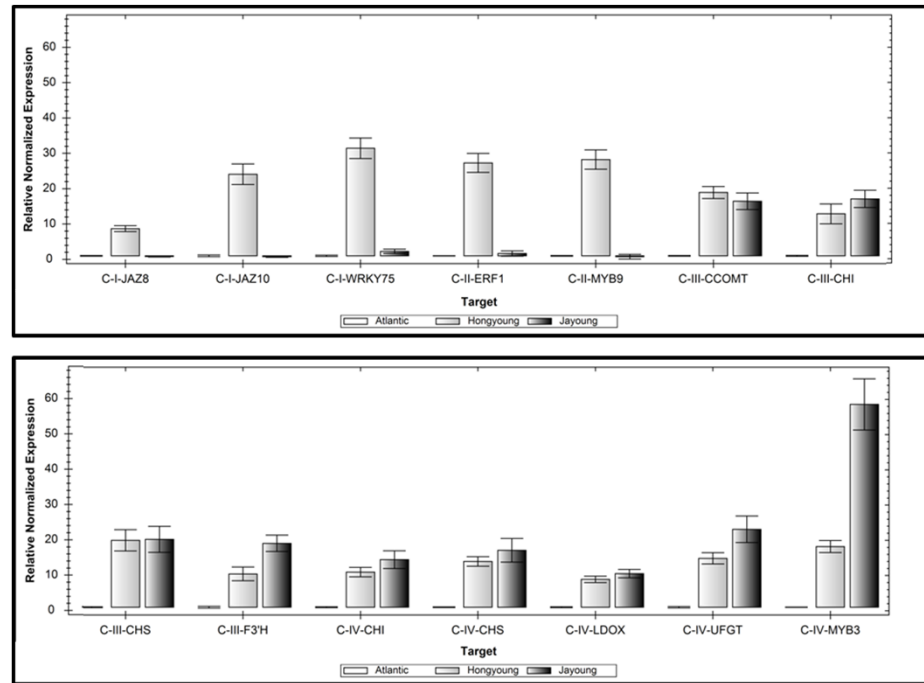

B)

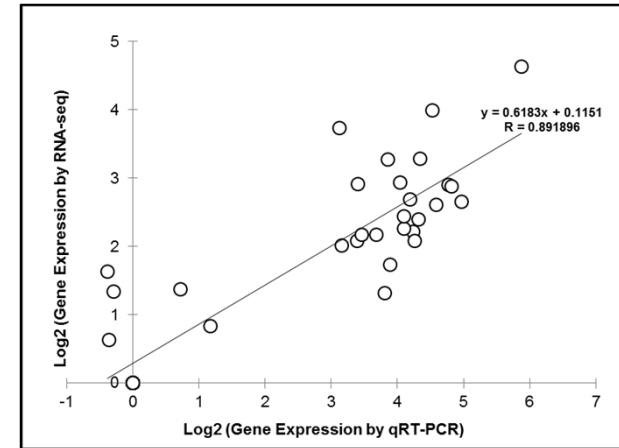

**Fig. S6.** Quantitative real-time RT-PCR (qPCR) analysis of genes involved in anthocyanin biosynthetic pathway and putative transcriptional regulators according to different color potato cultivars. A) transcriptomic qPCR analysis. The expression level of each gene is normalized by using a reference gene, actin (X55752) and then calculated as relative level in a color potato to in Atlantic (control). qPCR data are presented as means  $\pm$  SD for three biological replicates. *C-I-JAZ8*, PGSC0003DMT400022651 in Cluster I; *C-I-JAZ10*, PGSC0003DMT400016580 in Cluster I; *C-I-WRKY75*, PGSC0003DMT400056352 in Cluster I; *C-II-ERF1*, PGSC0003DMT400026627 in Cluster II; *C-II-MYB9*, PGSC0003DMT400045182 in Cluster II; *C-III-CCOMT*, PGSC0003DMT400016512 in Cluster III; *C-III-CHI*, PGSC0003DMT400030428 in Cluster III; *C-III-CHS*, PGSC0003DMT400076178 in Cluster III; *C-III-F3'H*, PGSC0003DMT400001125 in Cluster III; *C-IV-CHI*, PGSC0003DMT400030430 in Cluster IV; *C-IV-CHS*, PGSC0003DMT400049165 in Cluster IV; *C-IV-LDOX*, PGSC0003DMT400058554 in Cluster IV; *C-IV-UFGT*, PGSC0003DMT400062562 in Cluster IV; *C-IV-MYB3*, PGSC0003DMT400078477 in Cluster IV. The primer sequence for qPCR was described at supplementary table S1. B) Correlation analysis between qPCR-based gene expression level and corresponding RNA-Seq data.

**Table S1.** Primer list used in qPCR analysis

|             | Transcript ID        | Symbol | UniProt / TrEMBL | Gene annotation by The Potato Genome Sequencing Consortium (PGSC) | Name        | Forward                  | Reverse                   |
|-------------|----------------------|--------|------------------|-------------------------------------------------------------------|-------------|--------------------------|---------------------------|
| Cluster I   | PGSC0003DMT400022651 | JAZ8   | M1AH03           | Conserved gene of unknown function                                | C-I-JAZ8    | GAGGAGGATAAAGAAAGCACAG   | CAGTTTGAGTTGTAATAATGGTG   |
| Cluster I   | PGSC0003DMT400016580 | JAZ10  | M1A7W1           | Protein TIFY 9                                                    | C-I-JAZ10   | ATATTTATCCAATAGCTCCGTCGT | ACTGTTGATTGCCTCCTTGTG     |
| Cluster I   | PGSC0003DMT400056352 | WRKY75 | Q8H9D7           | WRKY-type DNA binding protein                                     | C-I-WRKY75  | TGATGATGGTTATAGATGGAGGA  | TCGGTAGATTTGCAATGGGA      |
| Cluster II  | PGSC0003DMT400026627 | ERF1   | M1ANG6           | Ethylene response factor 10                                       | C-II-ERF1   | CGATGGCTATACTTAACTTTCCTG | TCTTGCTCTGTTCTTCTACTCAC   |
| Cluster II  | PGSC0003DMT400045182 | MYB9   | M1BH83           | R2R3-myb transcription factor                                     | C-II-MYB9   | ATATAACAATCCACTTCCACCA   | TCTTGTGATGAATTGTTGCTTAGTC |
| Cluster III | PGSC0003DMT400016512 | CCOMT  | M1A7S3           | Caffeoyl-CoA O-methyltransferase                                  | C-III-CCOMT | GCTTCTAAAGATCATGAATGCCA  | AAATTGAATCTTATGCTCCACACC  |
| Cluster III | PGSC0003DMT400030428 | CHI    | M1AU87           | Chalcone isomerase                                                | C-III-CHI   | TGATGAAGAAATGGTACTTAGGTG | CCAAATACAATAGCCAACATGAC   |
| Cluster III | PGSC0003DMT400076178 | CHS    | Q43163           | Chalcone synthase 1B                                              | C-III-CHS   | CCAGCCCAAATCCAAGATAACTC  | GTTGTTCTCAGCCAAGTCTCT     |
| Cluster III | PGSC0003DMT400001125 | F3'H   | M0ZHY8           | Flavonoid 3',5'-hydroxylase                                       | C-III-F3'H  | CAAGGATGGGAATAGTGATGG    | CCTCACATTACGATCTTTAGCA    |
| Cluster IV  | PGSC0003DMT400030430 | CHI    | M1AU88           | Chalcone isomerase                                                | C-IV-CHI    | CTATTGTTAATGCTCCAGTTGAC  | ACGATATCTTTGCACTCCCA      |
| Cluster IV  | PGSC0003DMT400049165 | CHS    | M1BNC5           | Chalcone synthase 2                                               | C-IV-CHS    | ACTCTACTCCCTGATAGCGA     | TAGAATTCCAATCAGAAATGCCT   |
| Cluster IV  | PGSC0003DMT400058554 | LDOX   | M1C2V1           | Anthocyanin synthase                                              | C-IV-LDOX   | ATGAAGGGAAGTGGGTAAGT     | GGTGGGAATTGAGATGGCTC      |
| Cluster IV  | PGSC0003DMT400062562 | UFGT   | M1C989           | Anthocyanidin 3-O-glucosyltransferase                             | C-IV-UFGT   | GCAGGATTCAGTTCAGTAATAGAG | CTTATCAACCTCCATCATCACC    |
| Cluster IV  | PGSC0003DMT400078477 | MYB3   | M1D070           | Myb-like transcription factor 6                                   | C-IV-MYB3   | GAATTATGAGAAAGCCTTGTGTG  | CTATTAGTGACCACCTATTGCC    |
| Reference   | X55752               | Actin  |                  | Actin                                                             | ACTIN       | ATGGAAGTGAATGGTTAAGGCTGG | TGACCCATCCCTACCATAACACCG  |

**Table S2.** Exact mass of aglycones, sugars and acylated groups found anthocyanins and flavonoid glycosides.

| compound                      | moleuclar fomula | exact mass | extact mass-H <sub>2</sub> O |
|-------------------------------|------------------|------------|------------------------------|
| <b><i>Flavanone</i></b>       |                  |            |                              |
| naringenin                    | C15H12O5         | 272.07     | 254.06                       |
| <b><i>Flavone</i></b>         |                  |            |                              |
| apigenin                      | C15H10O5         | 270.05     | 252.04                       |
| luteolin                      | C15H10O6         | 286.05     | 268.04                       |
| tricetin                      | C15H10O7         | 302.04     | 284.03                       |
| <b><i>Flavonol</i></b>        |                  |            |                              |
| kaempferol                    | C15H10O6         | 286.05     | 268.04                       |
| quercetin                     | C15H10O7         | 302.04     | 284.03                       |
| myricetin                     | C15H10O8         | 318.04     | 300.03                       |
| <b><i>Dihydroflavonol</i></b> |                  |            |                              |
| dihydrokaempferol             | C15H12O7         | 304.06     | 286.05                       |
| dihydroquercetin              | C15H12O8         | 320.05     | 302.04                       |
| dihydromyricetin              | C15H12O9         | 336.05     | 318.04                       |
| <b><i>Anthocyanidin</i></b>   |                  |            |                              |
| pelargonidin (Pg)             | C15H11O5+        | 271.06     |                              |
| cyanidin (Cy)                 | C15H11O6+        | 287.06     |                              |
| peonidin (Pn)                 | C16H13O6+        | 301.07     |                              |
| petunidin (Pt)                | C16H13O7+        | 317.07     |                              |
| delphinidin (Dp)              | C15H11O7+        | 303.05     |                              |
| malvidin (Mv)                 | C17H15O7+        | 331.08     |                              |
| <b><i>Monosaccharides</i></b> |                  |            |                              |
| rhamnose (Rham)               | C6H12O5          | 164.07     | 146.06                       |
| hexose (Hex)                  | C6H12O6          | 180.06     | 162.05                       |
| <b><i>Acylated groups</i></b> |                  |            |                              |
| quinic acid                   | C7H12O6          | 192.06     | 174.05                       |
| coumaric acid (Coumaroyl)     | C9H8O3           | 164.05     | 146.04                       |
| caffeic acid (Caffeoyl)       | C9H8O4           | 180.04     | 162.03                       |
| ferulic acie (Feruloyl)       | C10H10O4         | 194.06     | 176.05                       |



**Table S3.** Identification of anthocyanin biosynthesis related compounds with MS/MS Spectra obtained in ESI+ and ESI- Modes

| RT<br>(min) | m/z                         |                                | Tentative Identification   | Formula                                               | m/z                  |                    |                         |                                                                                                                     | Fragment ions |
|-------------|-----------------------------|--------------------------------|----------------------------|-------------------------------------------------------|----------------------|--------------------|-------------------------|---------------------------------------------------------------------------------------------------------------------|---------------|
|             | ESI-                        | ESI+                           |                            |                                                       | ESI- ( $\Delta$ ppm) | ESI+<br>(ppm)      | ( $\Delta$ ESI-         | ESI+                                                                                                                |               |
| 1.34        | .                           | 310.2118<br>[M+H] <sup>+</sup> | Dihydrocaffeoyl-spermidine | C <sub>16</sub> H <sub>27</sub> N <sub>3</sub> O<br>3 | .                    | 310.2131<br>(4.1)  | .                       | 310.2123 (24), 293.1859 (32), 239.1410 (14), 222.1126 (100), 165.0536 (24), 123.0446 (25), 72.0805 (23)             |               |
| 1.83        | 147.0448 [M-H] <sup>-</sup> | 149.0587<br>[M+H] <sup>+</sup> | Cinnamic acid              | C <sub>9</sub> H <sub>8</sub> O <sub>2</sub>          | 147.0446<br>(1.3)    | 149.0603<br>(10.4) | .                       | .                                                                                                                   |               |
| 1.84        | 164.0714 [M-H] <sup>-</sup> | 166.0849<br>[M+H] <sup>+</sup> | Phenylalanine              | C <sub>9</sub> H <sub>11</sub> NO <sub>2</sub>        | 164.0712<br>(1.5)    | 166.0868<br>(11.5) | .                       | 166.0892 (2), 120.0816 (100), 103.0552 (80), 93.0706 (10), 91.0549 (20), 79.0544 (10), 77.0399 (50)                 |               |
| 2.07        | .                           | 251.1386<br>[M+H] <sup>+</sup> | Caffeoyl-putrescine        | C <sub>13</sub> H <sub>18</sub> N <sub>2</sub> O<br>3 | .                    | 251.1396<br>(3.9)  | .                       | 251.1419 (5), 234.1137 (9), 163.0393 (100), 145.0267 (38), 135.0443 (33), 117.0344 (29), 89.0400 (24), 72.0816 (14) |               |
| 2.18        | 353.0853 [M-H] <sup>-</sup> | .                              | Caffeoyl-quinic acid       | C <sub>16</sub> H <sub>18</sub> O <sub>9</sub>        | 353.0873             | .                  | 353.0860 (13), 191.0561 | .                                                                                                                   |               |

|      |                                                  |                                                  |                                   |                |                   |                    |                                                                                                                                                                         |                                                                                                                             |
|------|--------------------------------------------------|--------------------------------------------------|-----------------------------------|----------------|-------------------|--------------------|-------------------------------------------------------------------------------------------------------------------------------------------------------------------------|-----------------------------------------------------------------------------------------------------------------------------|
|      |                                                  |                                                  |                                   |                | (5.6)             |                    | (100), 179.0342 (45),<br>135.0450 (44)                                                                                                                                  |                                                                                                                             |
| 2.18 | 757.2166<br>[M+H <sub>2</sub> O-2H] <sup>-</sup> | 741.2220 [M+]                                    | Pelargonidin-Rham-2Hex            | C33H41O19      | 757.2191<br>(3.3) | 741.2242 (3)       | 757.2157 (65), 595.1591 (20),<br>501.1209 (30), 449.1057 (34),<br>(100), 431.1038 (10), 271.0605 (100)<br>311.0534 (15), 287.0544 (45),<br>269.0432 (25), 193.0117 (20) | 741.2231 (58), 579.1710<br>433.1135 (18)                                                                                    |
| 2.25 | 529.2991 [M-H] <sup>-</sup>                      | 531.3169<br>[M+H] <sup>+</sup>                   | Bis(dihydrocaffeoyl)-<br>spermine | C28H42N4O<br>6 | 529.3026<br>(6.6) | 531.3183<br>(2.6)  | 529.3011 (100), 407.2636<br>(15), 365.2525 (20), 285.2280<br>(2.5), 243.2161 (2.5),<br>163.0397 (2.5), 121.0304<br>(2.5)                                                | 531.3163 (100), 367.2689<br>(3), 293.1868 (67),<br>222.1138 (82), 165.0547<br>(11), 123.0441 (5)                            |
| 2.33 | 341.0859 [M-H] <sup>-</sup>                      | *360.1285<br>[M+H+NH <sub>3</sub> ] <sup>+</sup> | Caffeoyl-Hexose                   | C15H18O9       | 341.0873<br>(4.0) | .                  | 341.0870 (4), 179.0335 (4),<br>135.0445 (100)                                                                                                                           | 360.1285 (3), 181.0488<br>(67), 163.0373 (100),<br>135.0441 (80), 107.0515<br>(13)                                          |
| 2.45 | .                                                | 181.0481[M+H]<br>+                               | Caffeic acid                      | C9H8O4         | .                 | 181.0501<br>(11.0) | .                                                                                                                                                                       | 181.0490 (2), 163.0374<br>(9), 135.0442 (53),<br>107.0501 (100), 79.0550<br>(34), 77.0386 (77)                              |
| 2.54 | .                                                | 277.1653<br>[M+H] <sup>+</sup>                   | Coumaroyl-<br>agmatine            | C14H20N4O<br>2 | .                 | 277.1665<br>(4.2)  | .                                                                                                                                                                       | 277.1664 (17), 260.1391<br>(5), 235.1485 (3),<br>218.1194 (10), 147.0453<br>(100), 131.1297 (3),<br>119.0500 (21), 114.1034 |

|      |                             |                                |                                     |                |                    |                   |                                                                                                                               |                                                                                                                                                                                                                                                                        |                                               |
|------|-----------------------------|--------------------------------|-------------------------------------|----------------|--------------------|-------------------|-------------------------------------------------------------------------------------------------------------------------------|------------------------------------------------------------------------------------------------------------------------------------------------------------------------------------------------------------------------------------------------------------------------|-----------------------------------------------|
|      |                             |                                |                                     |                |                    |                   |                                                                                                                               |                                                                                                                                                                                                                                                                        | (7), 97.0766 (3), 91.0552<br>(7), 72.0830 (5) |
| 2.57 | 577.1497 [M-H] <sup>-</sup> | 579.1689<br>[M+H] <sup>+</sup> | Apigenin-Rham-Hex                   | C27H30O14      | 577.1557<br>(10.5) | 579.1714<br>(4.3) | 577.1539 (91),<br>269.0432<br>(100), 147.0067 (7)                                                                             | 579.1714 (23),<br>433.1110<br>(6), 271.0610 (100)                                                                                                                                                                                                                      |                                               |
| 2.57 | 755.1977 [M-H] <sup>-</sup> | 757.2159<br>[M+H] <sup>+</sup> | Kaempferol-Rham-2Hex                | C33H40O20      | 755.2035<br>(7.7)  | 757.2191<br>(4.2) | 755.1944 (49),<br>593.1472<br>(100), 285.0420 (38)                                                                            | 757.2150 (6),<br>611.1641<br>(18), 449.1097 (72),<br>287.0558 (100)                                                                                                                                                                                                    |                                               |
| 2.62 | 472.2415 [M-H] <sup>-</sup> | 474.2593<br>[M+H] <sup>+</sup> | Bis(dihydrocaffeoyl)-<br>spermidine | C25H35N3O<br>6 | 472.2448<br>(6.9)  | 474.2604<br>(2.3) | 472.2433 (100),<br>350.2052<br>(28), 308.1973 (42), 228.1699<br>(7), 186.1599 (7), 163.0384<br>(7), 121.0292 (7), 58.0321 (3) | 474.2608 (77),<br>457.2359<br>(7), 310.2112 (3),<br>293.1873 (5), 236.1282<br>(15), 222.1140 (100),<br>165.0550 (21), 123.0444<br>(16), 100.0753 (3),<br>72.0817 (3)                                                                                                   |                                               |
| 2.67 |                             | 307.1757<br>[M+H] <sup>+</sup> | Feruloyl- <i>agmatine</i>           | C15H22N4O<br>3 |                    | 307.1770<br>(4.3) |                                                                                                                               | 307.1778 (37),<br>290.1519<br>(6), 261.0871 (7),<br>247.1453 (4), 177.0559<br>(100), 175.0875 (10),<br>158.0605 (34), 157.0763<br>(17), 149.0592 (7),<br>145.0282 (62), 133.0446<br>(9), 130.0633 (30),<br>117.0338 (13), 114.1011<br>(3), 89.0384 (4), 72.0823<br>(3) |                                               |

|      |                                     |                                 |                                         |                |                    |                   |                                                                                                                                 |                                                                                                                                                       |
|------|-------------------------------------|---------------------------------|-----------------------------------------|----------------|--------------------|-------------------|---------------------------------------------------------------------------------------------------------------------------------|-------------------------------------------------------------------------------------------------------------------------------------------------------|
| 2.72 | 470.2265 [M-H] <sup>-</sup>         | 472.2435<br>[M+H] <sup>+</sup>  | Caffeoyl-dihydrocaffeoyl-<br>spermidine | C25H33N3O<br>6 | 470.2291<br>(5.6)  | 472.2448<br>(2.7) |                                                                                                                                 | 472.2446 (100), 310.2135<br>(17), 293.1847 (11),<br>234.1111 (11), 222.1117<br>(56), 165.0529 (8),<br>163.0372 (22)                                   |
| 2.75 | 675.1880 [2M-<br>H] <sup>-</sup>    |                                 | Coumaroyl-quinic acid                   | C16H18O8       | 675.1925<br>(6.7)  |                   | 675.1894 (2), 337.0923 (75),<br>191.0540 (100)                                                                                  |                                                                                                                                                       |
| 2.76 | 787.1989 [M-H] <sup>-</sup>         |                                 | Dihydrokaempferol-<br>Feruloyl-2Hex     | C37H40O19      | 787.2086<br>(12.3) |                   | 787.2081 (8), 449.1070 (100),<br>431.0991 (10), 337.0874 (17),<br>287.0620 (17), 269.0464 (20),<br>259.0630 (20), 191.0563 (13) |                                                                                                                                                       |
| 2.76 | 899.2186 [2M-<br>H] <sup>-</sup>    |                                 | Dihydrokaempferol-Hex                   | C21H22O11      | 899.2246<br>(6.7)  |                   | 899.2191 (13), 449.1100<br>(100), 287.0554 (17),<br>269.0465 (13), 259.0608 (8),<br>125.0245 (4)                                |                                                                                                                                                       |
| 2.77 | 449.1053 [M-H] <sup>-</sup>         | *451.1229<br>[M+H] <sup>+</sup> | Dihydrokaempferol-Hex                   | C21H22O11      | 449.1084<br>(6.9)  | 451.1240<br>(2.5) | 449.1024 (15), 421.1104 (20),<br>287.0542 (65), 259.0597<br>(100)                                                               | 451.0875 (10), 289.0723<br>(100), 271.0595 (31),<br>243.0647 (98), 215.0708<br>(67), 195.0282 (17),<br>153.0184 (80), 149.0236<br>(49), 107.0504 (18) |
| 2.81 | 935.2400<br>[M+H2O-2H] <sup>-</sup> | 919.2500 [M+] <sup>+</sup>      | Delphinidin-Coumaroyl-<br>Rham-2Hex     | C42H47O23      | 935.2457<br>(6.1)  | 919.2508<br>(0.9) | 935.2424 (100), 773.1845<br>(16), 755.1849 (18), 647.1624<br>(15), 621.1797 (10), 501.1252<br>(10), 481.0975 (4), 463.0818      | 919.2563 (100), 757.1982<br>(43), 465.1059 (28),<br>303.0516 (93)                                                                                     |

|      |                                                  |                                |                                         |           |                   |                   |                                                                                                                                                                                                                                                           |                                                                                                                                                |
|------|--------------------------------------------------|--------------------------------|-----------------------------------------|-----------|-------------------|-------------------|-----------------------------------------------------------------------------------------------------------------------------------------------------------------------------------------------------------------------------------------------------------|------------------------------------------------------------------------------------------------------------------------------------------------|
|      |                                                  |                                |                                         |           |                   |                   | (5), 319.0425 (4), 301.0307<br>(7), 283.0236 (7), 193.0145<br>(5), 175.0037 (10)                                                                                                                                                                          |                                                                                                                                                |
| 2.82 | 965.2502<br>[M+H <sub>2</sub> O-2H] <sup>-</sup> | 949.2591 [M+]                  | Petunidin-Caffeoyl-<br>Rham-2Hex        | C43H49O24 | 965.2563<br>(6.3) | 949.2614<br>(2.4) | 965.2528 (100), 825.2082 (6),<br>803.2017 (12), 785.1824 (6),<br>501.1184 (6), 495.1105 (19),<br>477.1037 (6), 333.0623 (8),<br>315.0493 (6), 297.0376 (3),<br>193.0162 (2)                                                                               | 949.2621 (100), 787.2059<br>(51), 479.1182 (25),<br>317.0660 (86)                                                                              |
| 2.90 | 367.1010 [M-H] <sup>-</sup>                      | 369.1175<br>[M+H] <sup>+</sup> | Feruloyl-quinic acid                    | C17H20O9  | 367.1029<br>(5.2) | 369.1186<br>(2.9) | 367.0999 (7), 191.0557 (100),<br>173.0439 (13), 134.0368 (14),<br>93.0354 (13)                                                                                                                                                                            | 369.1166 (1), 351.1049<br>(1), 195.0624 (1),<br>177.0550 (100), 149.0584<br>(6), 145.0274 (53),<br>134.0352 (3), 117.0331<br>(10), 89.0389 (5) |
| 2.93 | 919.2434<br>[M+H <sub>2</sub> O-2H] <sup>-</sup> | 903.2534 [M+]                  | Pelargonidin-Caffeoyl-<br>Rham-2Hex (I) | C42H47O22 | 919.2508<br>(8.1) | 903.2559<br>(2.8) | 919.2458 (100), 901.2360 (2),<br>825.2064 (3), 757.1952 (17),<br>739.1801 (8), 663.1501 (4),<br>637.1733 (6), 595.1584 (5),<br>577.1500 (4), 501.1205 (6),<br>469.1299 (25), 449.1054 (61),<br>367.0996 (6), 311.0559 (4),<br>287.0520 (18), 269.0433 (8) | 903.2552 (95), 741.1970<br>(58), 433.1139 (25),<br>271.0584 (100)                                                                              |
| 2.95 | 949.2550<br>[M+H <sub>2</sub> O-2H] <sup>-</sup> | 933.2652 [M+]                  | Peonidin-Caffeoyl-Rham-<br>2Hex (I)     | C43H49O23 | 949.2614<br>(6.7) | 933.2665<br>(1.4) | 949.2590 (100), 931.2557 (5),<br>787.2055 (35), 769.1991 (12),<br>625.1704 (5), 479.1195 (76),                                                                                                                                                            | 933.2654 (100), 771.2117<br>(46), 463.1248 (19),                                                                                               |

|      |                                                  |                                |                                          |                |                   |                   |                                                                                                                                                                                                                                                          |                                                                                                                                         |
|------|--------------------------------------------------|--------------------------------|------------------------------------------|----------------|-------------------|-------------------|----------------------------------------------------------------------------------------------------------------------------------------------------------------------------------------------------------------------------------------------------------|-----------------------------------------------------------------------------------------------------------------------------------------|
|      |                                                  |                                |                                          |                |                   |                   | 317.0648 (23), 299.0533 (12)                                                                                                                                                                                                                             | 301.0702 (82)                                                                                                                           |
| 2.96 | 919.245<br>[M+H <sub>2</sub> O-2H] <sup>-</sup>  | 903.2542 [M+]                  | Pelargonidin-Caffeoyl-<br>Rham-2Hex (II) | C42H47O22      | 919.2508<br>(6.3) | 903.2559<br>(1.9) | 919.2515(100), 901.2311 (2),<br>825.2117 (4), 757.1962 (18),<br>739.1811 (7), 663.1547 (4),<br>637.1706 (5), 595.1627 (3),<br>577.1550 (3), 501.1242 (5),<br>469.1304 (19), 449.1059 (52),<br>367.1029 (8), 311.0550 (3),<br>287.0546 (18), 269.0434 (4) | 903.2512 (100), 741.2010<br>(17),<br>433.1170 (17),<br>271.0585 (62)                                                                    |
| 3.01 | 949.2557<br>[M+H <sub>2</sub> O-2H] <sup>-</sup> | *933.2641 [M+]                 | Peonidin-Caffeoyl-Rham-<br>2Hex (II)     | C43H49O23      | 949.2614 (6)      | 933.2665<br>(2.5) | 949.2587 (100), 931.2554 (4),<br>787.2053 (23), 769.1910 (14),<br>479.1195 (45), 317.0464 (18),<br>299.0581 (5)                                                                                                                                          | 933.2612 (100), 771.2119<br>(18),<br>463.1220 (18),<br>301.0705 (72)                                                                    |
| 3.04 | 693.3453 [M-H] <sup>-</sup>                      | 695.3632<br>[M+H] <sup>+</sup> | Tri(dihydrocaffeoyl)-<br>spermine        | C37H50O9N<br>4 | 693.3500<br>(6.7) | 695.3656<br>(3.5) | 693.3494 (100), 571.3110 (8),<br>529.2995 (14), 449.2742 (3),<br>407.2647 (6), 365.2534 (3),<br>285.2308 (2)                                                                                                                                             | 695.3613 (100), 531.3146<br>(4),<br>457.2335 (4),<br>367.2727 (1), 293.1877<br>(15),<br>222.1123 (15),<br>165.0535 (3), 123.0446<br>(1) |
| 3.04 | 949.2558<br>[M+H <sub>2</sub> O-2H] <sup>-</sup> | *933.2643 [M+]                 | Petunidin-Coumaroyl-<br>Rham-2Hex        | C43H49O23      | 949.2614<br>(5.9) | 933.2665<br>(2.3) | 949.2583 (100), 809.2178 (3),<br>787.2089 (13), 769.1907 (5),<br>501.1256 (5), 495.1114 (10),<br>477.1046 (5), 333.0601 (5),<br>315.0471 (5), 297.0403 (5),<br>193.0123 (3)                                                                              | 933.2660 (100), 771.2123<br>(17),<br>479.1165 (17),<br>317.0670 (41)                                                                    |

|      |                                                  |                                |                                      |           |                   |                     |                                                                                                                                                                                                                                 |                                                                                   |
|------|--------------------------------------------------|--------------------------------|--------------------------------------|-----------|-------------------|---------------------|---------------------------------------------------------------------------------------------------------------------------------------------------------------------------------------------------------------------------------|-----------------------------------------------------------------------------------|
| 3.07 | 979.2672<br>[M+H <sub>2</sub> O-2H] <sup>-</sup> | 963.2773 [M+]                  | Petunidin-Feruloyl-<br>Rham-2Hex     | C44H51O24 | 979.2720<br>(4.9) | 963.2770 (-<br>0.3) | 979.2683 (100), 817.2186<br>(28), 799.2017 (11), 691.1805<br>(4), 677.1688 (13), 651.1865<br>(4), 641.1685 (2), 501.1180<br>(7), 495.1102 (21), 477.1034<br>(6), 333.0593 (10), 315.0514<br>(11), 297.0396 (9), 193.0119<br>(3) | 963.2778 (100), 801.2211<br>(8), 639.3135 (8),<br>493.3135 (17), 331.0844<br>(75) |
| 3.08 | 885.2384 [M-H] <sup>-</sup>                      | 887.2589<br>[M+H] <sup>+</sup> | Apigenin-Coumaroyl-<br>Rham-2Hex     | C42H46O21 | 885.2453<br>(7.8) | 887.2610<br>(2.4)   | 885.2422 (59), 723.1907 (87),<br>577.1512 (18), 431.0953<br>(100), 269.0436 (68), 271.0613<br>(100)<br>147.0104 (2)                                                                                                             | 887.2607 (61), 725.2075<br>(47), 433.1146 (47),<br>271.0613 (100)                 |
| 3.08 | 903.2503<br>[M+H <sub>2</sub> O-2H] <sup>-</sup> | 887.2589 [M+]                  | Pelargonidin-Coumaroyl-<br>Rham-2Hex | C42H47O21 | 903.2559<br>(6.2) | 887.2610<br>(2.4)   | 903.2523 (84), 741.2000 (22),<br>723.1873 (7), 647.1579 (11),<br>621.1752 (5), 595.1629 (3),<br>577.1546 (3), 501.1180 (8),<br>449.1059 (100), 311.0534 (7),<br>287.0544 (20), 269.0432 (8),<br>193.0098 (5)                    | 887.2604 (50), 725.2071<br>(100), 433.1142 (42),<br>271.0609 (100)                |
| 3.13 | 933.2608<br>[M+H <sub>2</sub> O-2H] <sup>-</sup> | 917.2692 [M+]                  | Peonidin-Coumaroyl-<br>Rham-2Hex     | C43H49O22 | 933.2665<br>(6.1) | 917.2716<br>(2.6)   | 933.2639 (21), 771.2127 (22),<br>753.2012 (7), 479.1180 (100),<br>341.0650 (8), 317.0661 (20),<br>299.0546 (9)                                                                                                                  | 917.2702 (71), 755.2172<br>(100), 463.1248 (48),<br>301.0727 (87)                 |
| 3.14 | 163.0396 [M-H] <sup>-</sup>                      | .                              | Coumaric acid                        | C9H8O3    | 163.0395<br>(0.5) | .                   | .                                                                                                                                                                                                                               | .                                                                                 |

|      |                                                     |                                |                                 |           |                    |                   |                                                                                                                                               |                                                                   |
|------|-----------------------------------------------------|--------------------------------|---------------------------------|-----------|--------------------|-------------------|-----------------------------------------------------------------------------------------------------------------------------------------------|-------------------------------------------------------------------|
| 3.14 | 979.2654<br>[M+FA+H <sub>2</sub> O-2H] <sup>-</sup> | 917.2692 [M+]                  | Peonidin-Coumaroyl-Rham-2Hex    | C43H49O22 | 979.2720<br>(6.7)  | 917.2716<br>(2.6) | 979.2691 (22), 933.2682 (62),<br>771.2166 (24), 753.2012 (8),<br>479.1180 (100), 461.1096 (3),<br>317.0686 (19), 299.0570 (10)                | 917.2685 (76), 755.2161<br>(100), 463.1215 (26),<br>301.0704 (66) |
| 3.17 | 1009.2753<br>[M+H <sub>2</sub> O-2H] <sup>-</sup>   | 947.2797 [M+]                  | Peonidin-Feruloyl-Rham-2Hex     | C44H51O23 | 1009.2825<br>(7.2) | 947.2821<br>(2.6) | 1009.2775 (1), 963.2697 (78),<br>801.2173 (16), 783.2048 (11),<br>479.1168 (100), 341.0647 (6),<br>317.0659 (22), 299.0569 (10)               | 947.2784 (100), 785.2254<br>(36), 463.1242 (22),<br>301.0699 (65) |
| 3.17 | 963.2708<br>[M+H <sub>2</sub> O-2H] <sup>-</sup>    | 947.2797 [M+]                  | Malvidin-Coumaroyl-Rham-2Hex    | C44H51O23 | 963.2770<br>(6.5)  | 947.2821<br>(2.6) | 963.27322 (40), 945.2715 (3),<br>801.2234 (17), 783.2106 (7),<br>509.1292 (100), 347.0762<br>(17), 329.0673 (10)                              | 947.2806 (100), 785.2313<br>(88), 493.1369 (48),<br>331.0828 (86) |
| 3.25 | 979.264<br>[M+H <sub>2</sub> O-2H] <sup>-</sup>     | *917.2692 [M+]                 | Pelargonidin-Feruloyl-Rham-2Hex | C43H49O22 | 979.2720<br>(8.1)  | 917.2716<br>(2.6) | 979.2510 (3), 933.2637 (100),<br>771.2094 (22), 753.2019 (5),<br>501.1166 (5), 449.1048 (90),<br>287.0542 (13), 269.0431 (9),<br>193.0119 (4) | 917.2685 (76), 755.2161<br>(100), 433.1109 (21),<br>271.0611 (56) |
| 3.26 | 593.1467 [M-H] <sup>-</sup>                         | 595.1637<br>[M+H] <sup>+</sup> | Kaempferol-Rham-Hex             | C27H30O15 | 593.1507<br>(6.7)  | 595.1663<br>(4.4) | 593.1459 (78), 327.0488 (5),<br>285.0393 (100), 255.0293<br>(13), 227.0328 (6), 151.0049<br>(3)                                               | 595.1647 (2), 449.1125<br>(5), 287.0561 (100)                     |
| 3.29 | 193.0496 [M-H] <sup>-</sup>                         | .                              | Ferulic acid                    | C10H10O4  | 193.0501<br>(2.5)  | .                 | .                                                                                                                                             | .                                                                 |
| 3.32 | 723.1884 [M-H] <sup>-</sup>                         | 725.2052                       | Apigenin-Coumaroyl-             | C36H36O16 | 723.1925           | 725.2082          | 723.1851 (100), 577.1534                                                                                                                      | 725.2100 (26), 433.1138                                           |



|      |                             |                             |                                 |            |                |                |                                                                                                                                                                                                                           |                                                                                                                                    |
|------|-----------------------------|-----------------------------|---------------------------------|------------|----------------|----------------|---------------------------------------------------------------------------------------------------------------------------------------------------------------------------------------------------------------------------|------------------------------------------------------------------------------------------------------------------------------------|
|      |                             | [M+H] <sup>+</sup>          | Rham-Hex                        |            | (5.7)          | (4.1)          | (45), 269.0435 (95), 147.0090 (3)                                                                                                                                                                                         | (6), 271.0608 (100)                                                                                                                |
| 3.38 | 753.1958 [M-H] <sup>-</sup> | 755.2162 [M+H] <sup>+</sup> | Apigenin-Feruloyl-Rham-Hex      | C37H38O17  | 753.2031 (9.7) | 755.2187 (3.4) | 753.2017 (100), 577.1493 (33), 269.0432 (60)                                                                                                                                                                              | 755.2208 (46), 433.1084 (6), 271.0613 (100)                                                                                        |
| 3.47 | 636.2878 [M-H] <sup>-</sup> | 638.306 [M+H] <sup>+</sup>  | Tri(dihydrocaffeoyl)-spermidine | C34H43O9N3 | 636.2921 (6.8) | 638.3078 (2.8) | 636.2916 (100), 514.2556 (6), 472.2432 (17), 392.2187(3), 350.2077 (6), 308.1972 (4), 228.1720 (2)                                                                                                                        | 638.3069 (100), 474.2639 (43), 456.2517 (94), 310.2112 920, 293.1875 (62), 236.1281 (6), 222.1121 (79), 165.0553 (5), 123.0462 (2) |
| 3.64 | 287.0535 [M-H] <sup>-</sup> |                             | Dihydrokaempferol               | C15H12O6   | 287.0556 (7.2) |                | 287.0564 (38), 269.0429 (7), 259.0619 (100), 243.0663 (23), 215.0713 (17), 201.0562 (20), 177.0539 (41), 173.0604 (16), 151.0031 (28), 125.0255 (95), 107.0136 (7), 83.0151 (13), 65.0051 (10), 63.0625 (8), 57.0375 (15) |                                                                                                                                    |
| 4.05 | 769.1902 [M-H] <sup>-</sup> |                             | Kaempferol-Feruloyl-Rham-Hex    | C37H38O18  | 769.198 (10.1) |                | 769.4076 (100), 593.1574 (6), 285.0413 (6)                                                                                                                                                                                |                                                                                                                                    |
